# Supplementary material for: Underwater superoleophobic PVA–GO nanofibrous membranes for emulsified oily water purification
Source: Royal Society of Chemistry journal article supplement (doi:10.1039/c9en00883g), 2019-01-01
Supplement: c9en00883g2.pdf [file c9en00883g2.pdf]

Supporting Information for *Environmental Science: Nano*

**Underwater Superoleophilic PVA-GO Nanofibrous  
Membranes for Emulsified Oily Water Remediation**

**Abdul Ghaffar<sup>1,2,3</sup>, Cheng Chen<sup>1,2</sup>, Xiaoying Zhu<sup>1,2</sup> and Baoliang Chen<sup>\* 1,2</sup>**

*1. Department of Environmental Science, Zhejiang University, Hangzhou, Zhejiang 310058, China.*

*2. Zhejiang Provincial Key Laboratory of Organic Pollution Process and Control, Hangzhou Zhejiang 310058, China.*

*3. Shenyang National Laboratory for Materials Science, Institute of Metal Research, Chinese Academy of Sciences, 72 Wenhua Road, Shenyang 110016, China.*

\*Corresponding authors email:

Dr. Chen Baoliang            blchen@zju.edu.cn

Tel:                            +86 – 571 – 8898 – 2587

Fax:                            +86 – 571 – 8898 – 2587

Coauthor emails:

Dr. Abdul Ghaffar:        aghaffar@zju.edu.cn, abdulghaffar\_30@yahoo.com

Cheng Chen:                840627088@qq.com

Dr. Xiaoying Zhu:        zhux@zju.edu.cn

## Synthesis of graphene oxide (GO)

GO was synthesized from natural Graphite flake (325 mesh, 99.8%, Alfa Aesar) by modified Hummers method. Generally, the graphite powder (10 g) was added into concentrated  $\text{H}_2\text{SO}_4$  (40 mL) at 80 °C, containing  $\text{K}_2\text{S}_2\text{O}_8$  (8.33 g) and  $\text{P}_2\text{O}_5$  (8.33 g), for 4.5 h. After that, the mixture was collected and rinsed with deionized water until the pH became neutral, dried in oven overnight at 60 °C, thus pre-oxidized graphite obtained. The pre-oxidized graphite powder (10 g) and  $\text{NaNO}_3$  (5 g) were put into an ice bath (0 °C) concentrated  $\text{H}_2\text{SO}_4$  (230 mL), and  $\text{KMnO}_4$  (30 g) was slowly added with continuous stirring to keep the temperature below 4 °C. Then the mixture was stirred at 35 °C for 2 h, after which deionized water (460 mL) was gradually added, producing much heat. The mixture was further stirred for 15 min at 98 °C to increase the oxidation level, following an addition of deionized water (460 mL) and 30%  $\text{H}_2\text{O}_2$  solution (25 mL) to terminate the reaction, so as to obtain graphite oxide. The resultant bright yellow mixture was rinsed by 10%  $\text{HCl}$  solution (3.6 L) to remove the residual  $\text{SO}_4^{2-}$  (checked by  $0.01 \text{ mol L}^{-1}$   $\text{BaCl}_2$ ) and metal ions, followed by centrifugation at 8000 rpm. The solid phase was re-dispersed in deionized water and peeled off by ultra-sonication for 30 min at 250 W of power. The centrifugation and ultra-sonication was repeated 3 times, and the solution was subjected to dialysis to remove the acid and other impurities. Finally, GO was obtained as powder after vacuum drying at 60 °C.

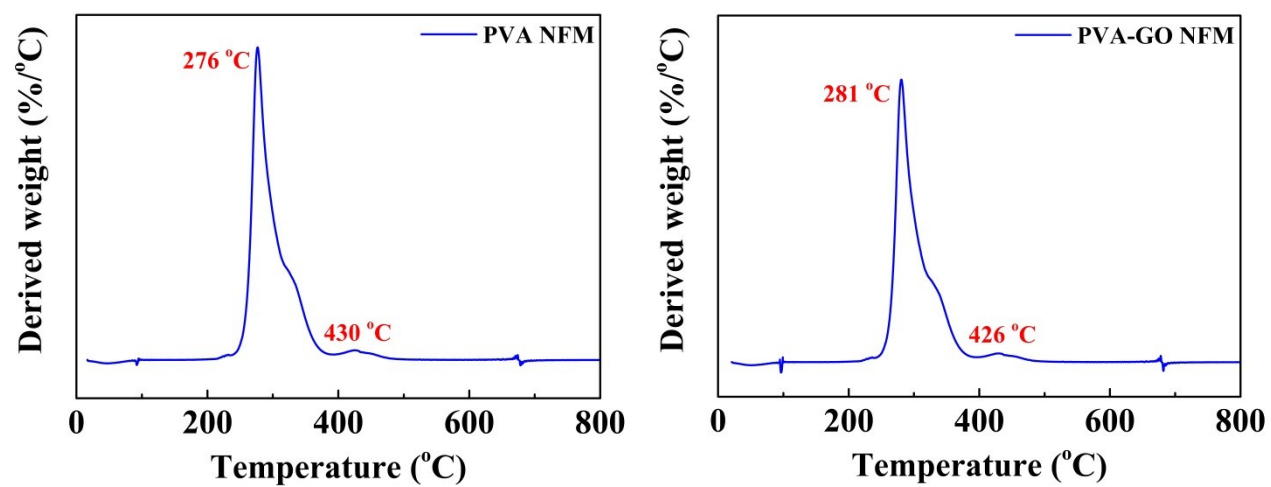

**Figure S1.** Derived thermogravimetric (DTG) curves of PVA and PVA-GO NFMs.

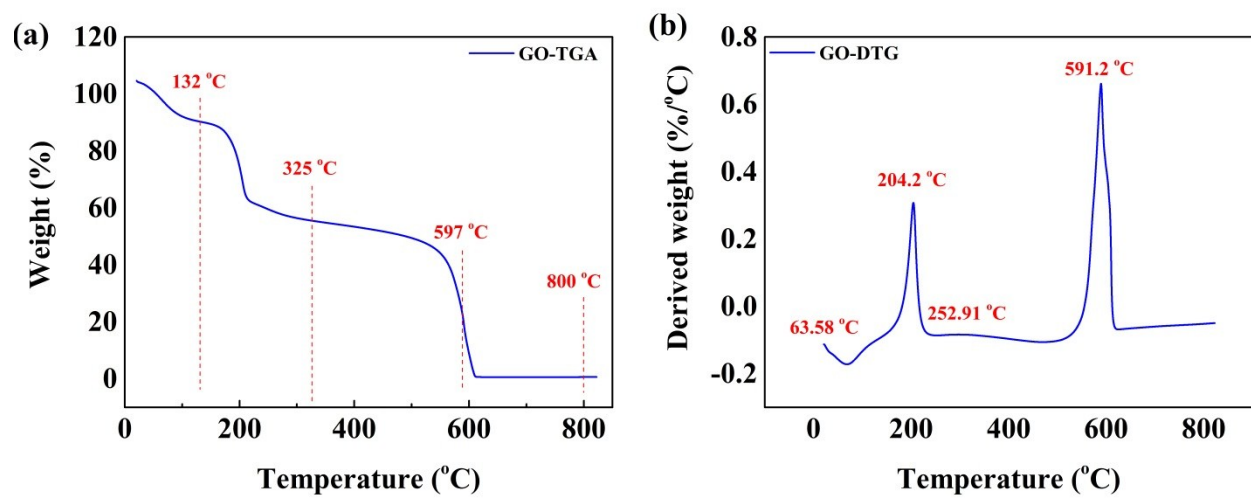

**Figure S2.** Thermogravimetric (a) and derived thermogravimetric (b) curves of GO.

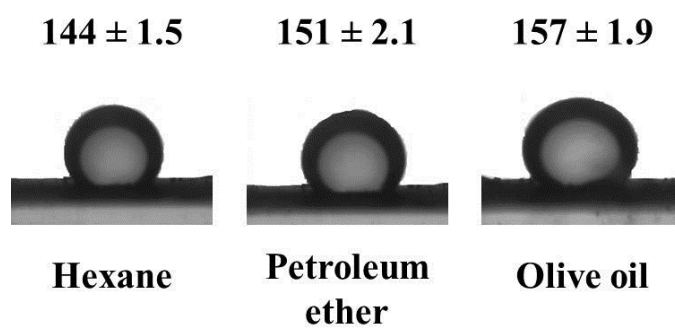

**Figure S3.** Under water oil contact angles of hexane, petroleum ether, and olive oil on the surface of PVA-GO NFM.

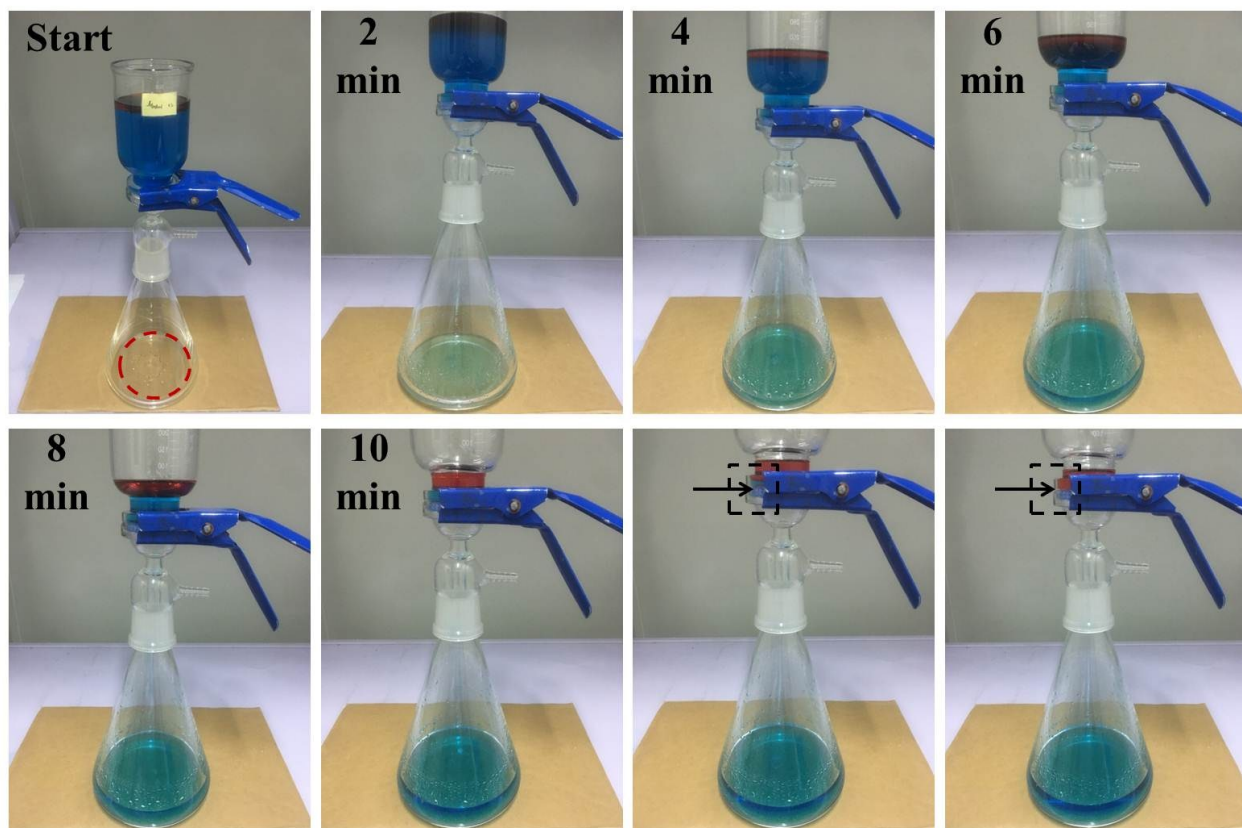

**Figure S4.** The optical photographs of oily water remediation and anti-oil property with PVA-GO NFM.
